# Supplementary material for: Facile shape control of nano-coaxial Co3O4/TiO2 arrays and the effect of the microstructure on lithium storage capability
Source: Royal Society of Chemistry journal article supplement (doi:10.1039/c5nj02068a), 2015-11-16
Supplement: c5nj02068a1.pdf [file c5nj02068a1.pdf]

Electronic Supplementary Material (ESI) for New Journal of Chemistry. This journal is © The Royal Society of Chemistry and the Centre National de la Recherche Scientifique 2015

## Electronic Supplementary Information

### Facile shape control of nano-coaxial $\text{Co}_3\text{O}_4/\text{TiO}_2$ arrays and the effect of the microstructure on lithium storage capability

Tao Qi, Shichao Zhang,\* Xiaomeng Wu, Yalan Xing, Guanrao Liu and Yanbiao Ren  
School of Materials Science and Engineering, Beijing University of Aeronautics and Astronautics,  
Beijing 100191, P R China

School of Materials Science and Engineering, Beijing University of Aeronautics and Astronautics,  
Beijing 100191, P R China;  
Fax: +86-10-82339319;Tel:+86-10-82338148;E-mail: [csc@buaa.edu.cn](mailto:csc@buaa.edu.cn)

### Supporting Figures

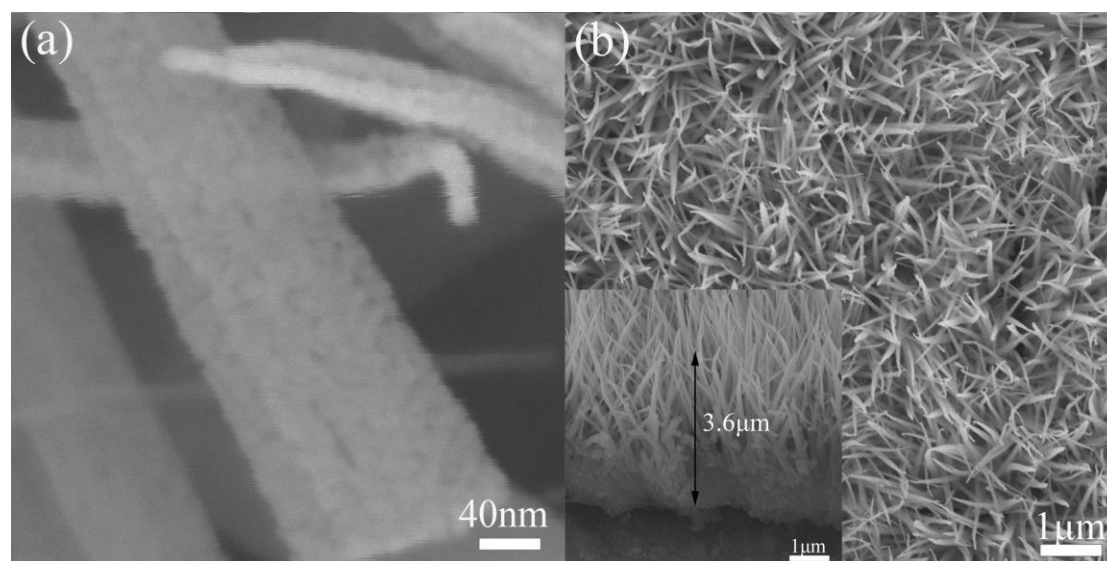

**Fig. S1** (a) High-magnification image of  $\text{Co}_3\text{O}_4$  NW from S-2; (b) low-magnification image of  $\text{Co}_3\text{O}_4$  NWs array from S-1, and its cross-sectional view (inset).

Obviously, one  $\text{Co}_3\text{O}_4$  NW is composed of numerous nanoparticles showing a porous trait and lots of NWs stand basically straight up from the substrate with plenty of inter-wire space between these NWs.

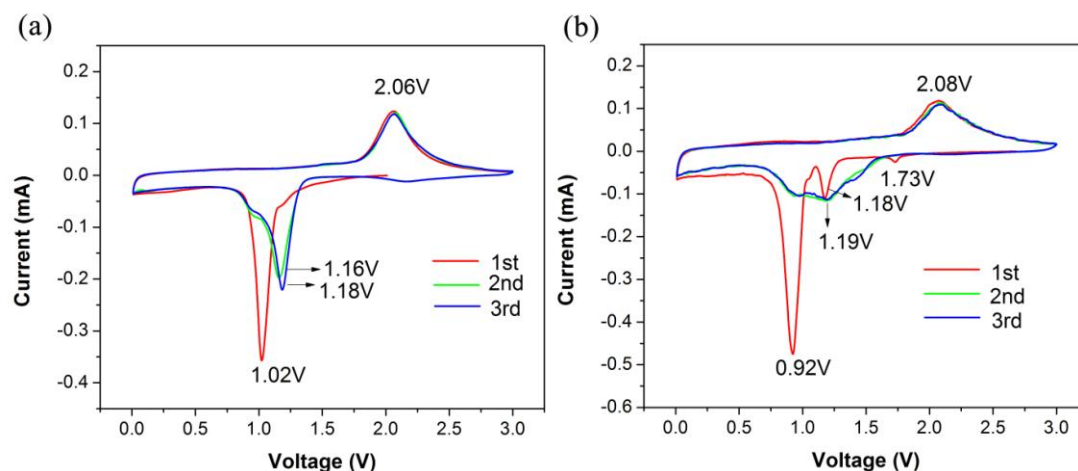

**Fig. S2** (a) CV of the Co<sub>3</sub>O<sub>4</sub> NW arrays of S-1, (b) Co<sub>3</sub>O<sub>4</sub>/TiO<sub>2</sub> core-shell nanohybrids of S-1.

It is noteworthy that both the peak current and the integrated area of the cathodic/anodic peak are almost constant after the 2nd cycle, indicating both the formed SEI layer and the electrode materials are highly stable.

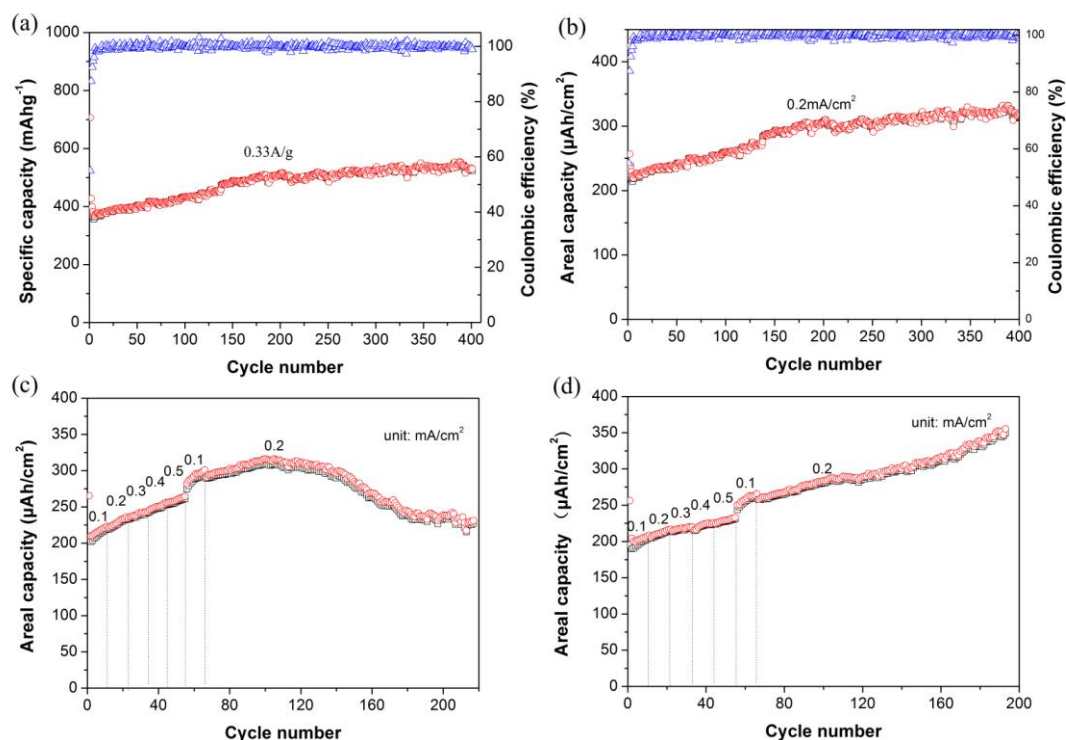

**Fig. S3** (a) Cycling performance (specific capacity) and Coulombic efficiency of the Co<sub>3</sub>O<sub>4</sub>/TiO<sub>2</sub> nanohybrids from S-1 at a current density of 0.33 A/g; (b) Cycling performance (areal capacity) and coulombic efficiency of the Co<sub>3</sub>O<sub>4</sub>/TiO<sub>2</sub> nanohybrids from S-1 at a current density of 0.2 mA/cm<sup>2</sup>; (c and d) Cycling responses of pure Co<sub>3</sub>O<sub>4</sub> NWs and Co<sub>3</sub>O<sub>4</sub>/TiO<sub>2</sub> nanohybrids from S-1 at programmed current densities, respectively.

Compared with pristine  $\text{Co}_3\text{O}_4$  NWs, nanohybrids with thick  $\text{TiO}_2$  shell exhibit good cycling stability but limited specific capacity. It should be noted that  $\text{Co}_3\text{O}_4$  electrode exhibits no more than  $400 \mu\text{Ah}/\text{cm}^2$  in S-1, though it is quite stable compared to S-2. (c) and (d) compared the rate performance between  $\text{Co}_3\text{O}_4$  electrode and  $\text{Co}_3\text{O}_4/\text{TiO}_2$  electrode, from which we cannot distinguish the better one due to the activation progress during the early stage. But the hybrids still exhibit better cyclability after 120 cycles, which may be attributed to the coating effect of the stable  $\text{TiO}_2$  shell.

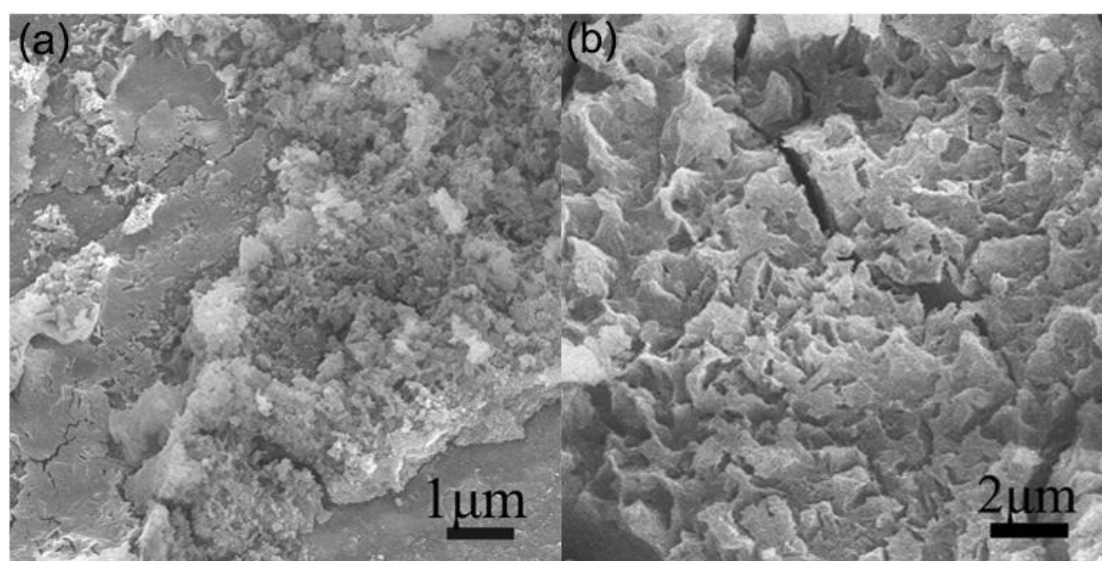

**Fig. S4** (a) SEM image of the  $\text{Co}_3\text{O}_4$  NW arrays after 200 cycles at  $0.2\text{mA}/\text{cm}^2$ ; (b) SEM image of  $\text{Co}_3\text{O}_4/\text{TiO}_2$  nanohybrids after 200 cycles at  $0.2\text{mA}/\text{cm}^2$ .

Fig. S4 shows typical SEM images of the two electrodes after galvanostatic charge-discharge cycling. Both samples no longer maintain nanowire morphology after repeating charge-discharge process. Obvious pulverization and exfoliation of the  $\text{Co}_3\text{O}_4$  film are observed all over the current collector after the 200th cycle in Fig. S4a, which would be regarded as the main cause of the capacity decay. Contrarily, the morphology of  $\text{Co}_3\text{O}_4/\text{TiO}_2$  electrode after 200 cycles shows much less exfoliation though slight cracking can be seen due to vast volume expansion. Considering the coating effect of  $\text{TiO}_2$  shell, the enormous volume change and internal strain are accommodated to restrict cracking. The results demonstrate that the core-shell nanohybrids can accommodate the strain and keep the structural integrity during many cycles.
